# Supplementary material
Source: PubMed Central journal article supplement (PMC6141184)
Supplement: jciinsight-3-120880-s030.pdf [file jciinsight-3-120880-s030.pdf]

a

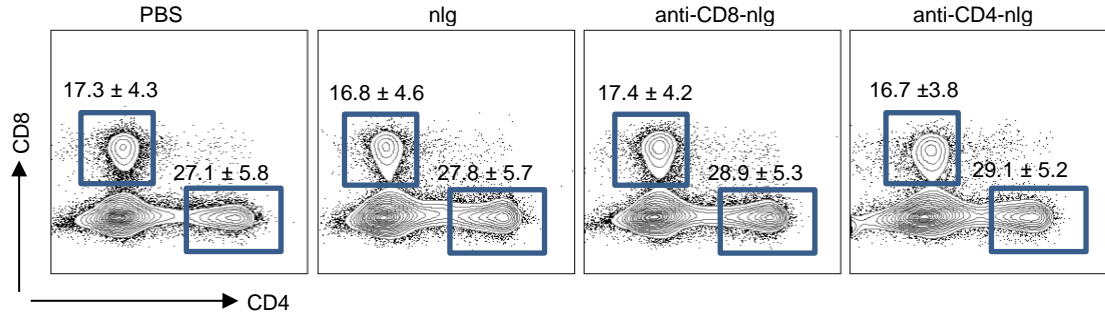

b

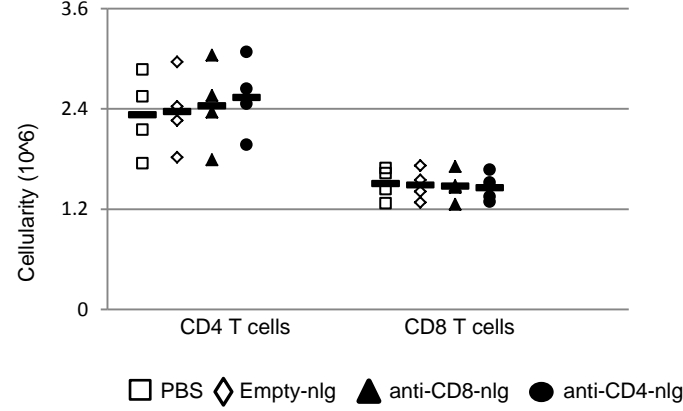

**Supplemental Figure 1. Empty nlg targeting to either CD4 or CD8 T cells does not affect T cell cellularity *in vivo*.**

Age and sex matched MRL/*lpr* mice were treated i.v. with either anti-CD4 antibody or anti-CD8 antibody coated-empty-nlg (equivalent to 50 µg antibody per mouse) for 48 hrs. PBS or empty-nlg were applied to two control groups separately. (a) Flow cytometry analysis of splenic T cells. Data represent the mean ± SEM (n = 4 mice per group). (b) Dot plot graph shows quantitation of the absolute cell numbers of CD4 and CD8 T cells from the spleens of mice subjected to the indicated treatment.

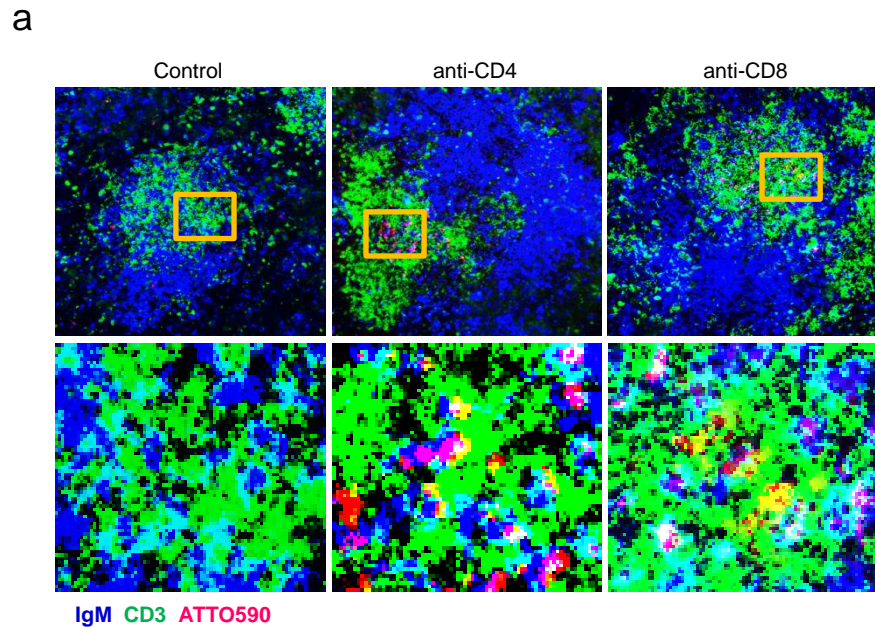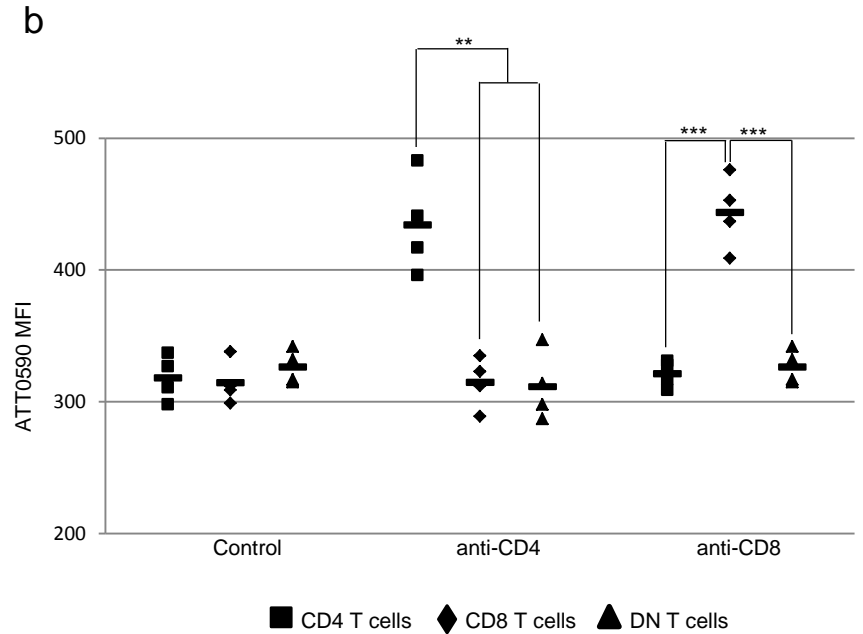

**Supplemental Figure 2. Targeted delivery of ATTO590 by antibody-coated nlG.**

12 weeks old MRL/*lpr* mice were treated i.v. with either anti-CD4 antibody or anti-CD8 antibody coated-nlG-ATTO590 (a fluorescent dye derived from Rhodamine), and isotype control antibody coated-nlG-ATTO590 was used as control. Mice were euthanized 30 min after nlG administration for analysis,  $n = 4$  mice per group. (a) Confocal microscopic images show the distribution of ATTO590<sup>+</sup> cells in representative splenic follicles. Original magnification,  $\times 20$ ; Boxed areas in the upper panel are digitally magnified and shown in the bottom panels (IgM : blue, CD3 : green and ATTO590 : red). (b) Dot plot graph shows quantitation of ATTO590 MFI in different T cell subsets from spleens of mice subjected to the indicated treatment.  $**P < 0.01$ ,  $***P < 0.005$  vs. control, a 2-tailed Student's  $t$  test.

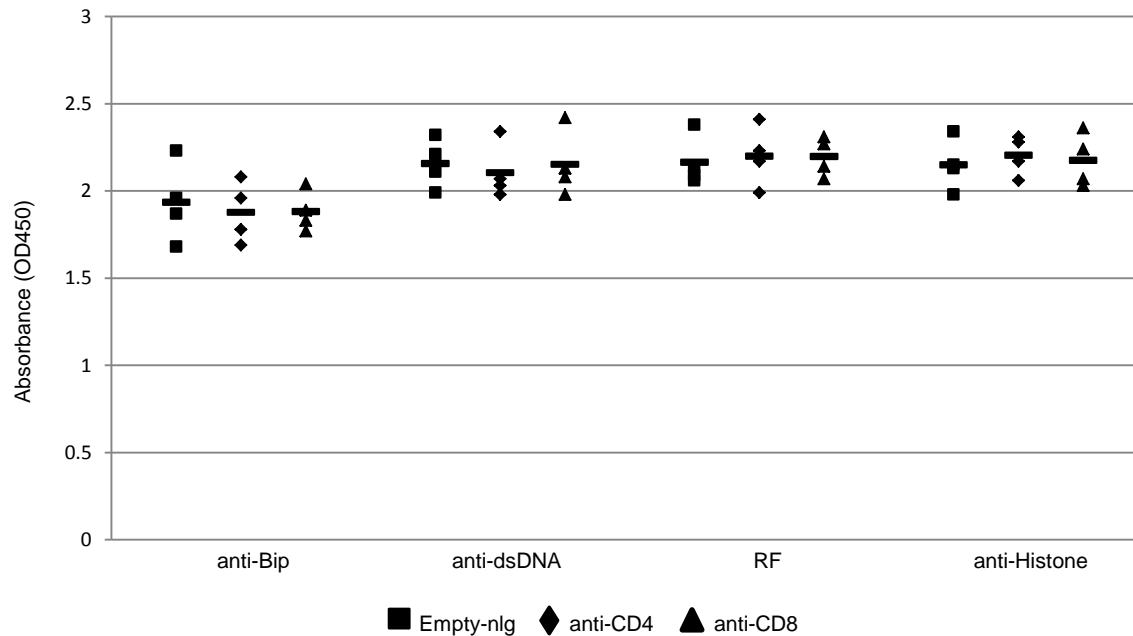

**Supplemental Figure 3. Empty nlG targeting to either CD4 or CD8 T cells does not alter production of auto-antibodies in MRL/lpr mice.**

Age matched MRL/lpr mice were treated i.v. with either anti-CD4 antibody or anti-CD8 antibody coated empty-nlg (15  $\mu$ l nlG-5-Aza/mouse) weekly for 4 weeks starting at 10 weeks of age. Empty-nlg was used in control group. Dot plot graph shows the ELISA analysis of IgG autoantibodies in the serum from mice subjected to the indicated treatment.  $n = 4$  mice per group.

a

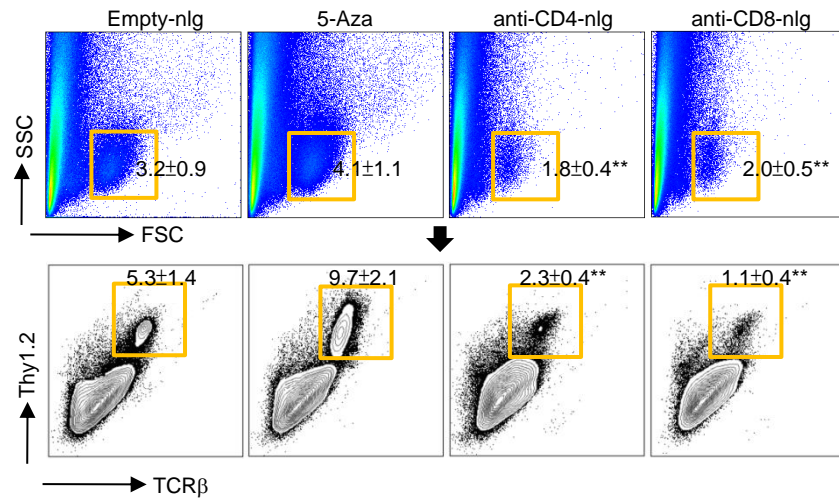

b

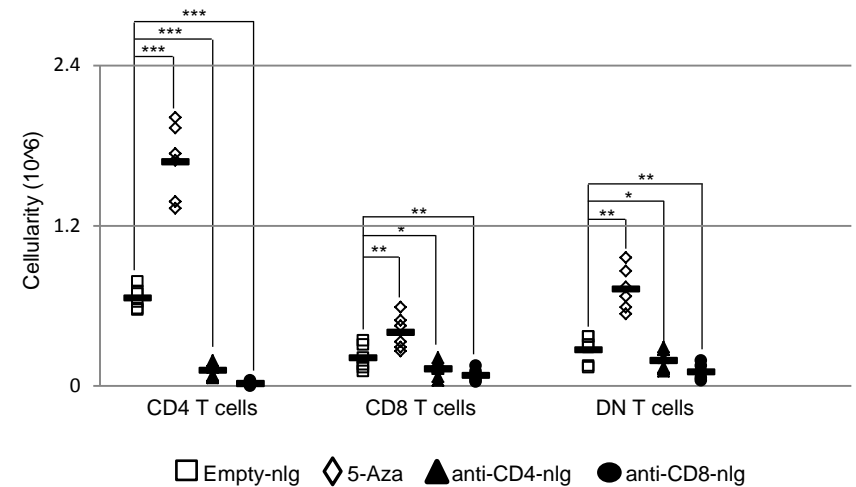

#### Supplemental Figure 4. Nlg-5-Aza targeting to either CD4 or CD8 T cells dramatically reduces intrarenal CD4, CD8 and DN T cells.

MRL/lpr mice were treated i.v. with either anti-CD4 antibody coated-nlg-5-Aza ( $15\mu\text{l}$  nlg-5-Aza/mouse) or anti-CD8 antibody coated-nlg-5-Aza ( $15\mu\text{l}$  nlg-5-Aza/mouse) every ten days for 60 days starting at 12 weeks of age. Free-5-Aza ( $5\mu\text{g}/\text{mouse}$ ) or empty-nlg were applied to two control groups separately. (a) Flow cytometry analysis of intrarenal T cells. Data represent the mean  $\pm$  SEM. (b) Dot plot graph shows quantitation of the absolute cell numbers of CD4, CD8 and DN T cells from the kidneys of mice subjected to the indicated treatment. \* $P < 0.05$ , \*\* $P < 0.01$ , \*\*\* $P < 0.005$  vs. control, a 2-tailed Student's  $t$  test.  $n = 5-6$  mice per group for 2 independent experiments.

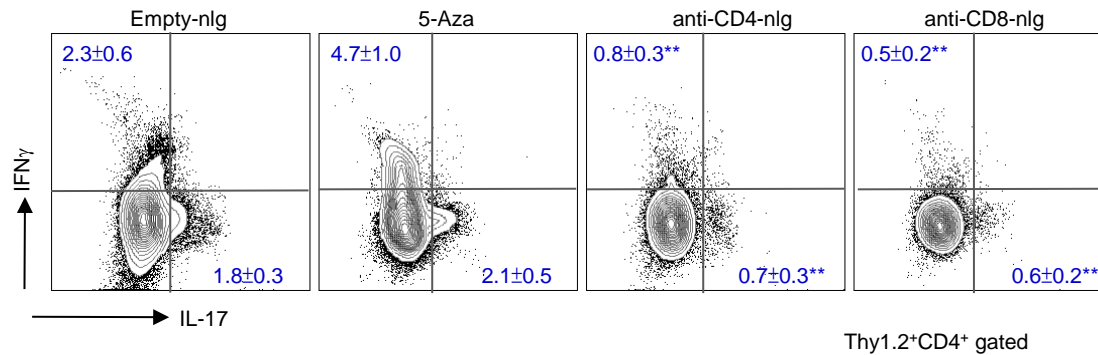

**Supplemental Figure 5. Nlg-5-Aza targeting to either CD4 or CD8 T cells dramatically reduces both inflammatory Th1 and Th17 cells in the cervical lymph nodes.**

MRL/lpr mice were treated i.v. with either anti-CD4 antibody coated-nlg-5-Aza (15 $\mu$ l nlg-5-Aza/mouse) or anti-CD8 antibody coated-nlg-5-Aza (15 $\mu$ l nlg-5-Aza/mouse) every ten days for 60 days starting at 12 weeks of age. Free-5-Aza (5 $\mu$ g/mouse) or empty-nlg were applied to two control groups separately. Flow cytometry analysis of IL-17 and IFN $\gamma$  expression in CD4<sup>+</sup> T cells of spleens from mice subjected to the indicated treatment (gated in CD3<sup>+</sup>CD4<sup>+</sup>TCR $\beta$ <sup>+</sup>CD49b<sup>-</sup>). Data represents the mean  $\pm$  SEM (\*\* $P$  < 0.01 vs. Control, a 2-tailed Student's  $t$  test.  $n$  = 5-6 mice per group for 2 independent experiments).

a

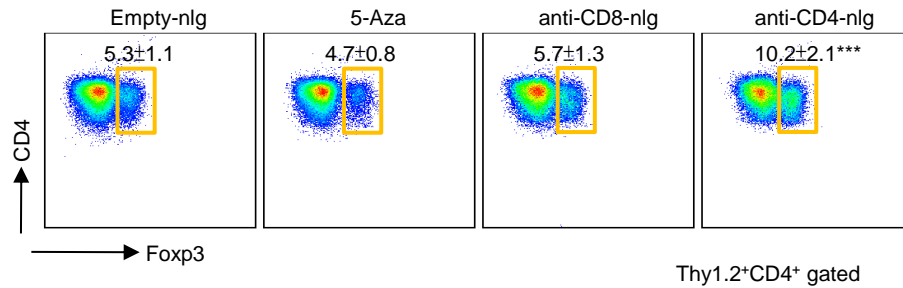

b

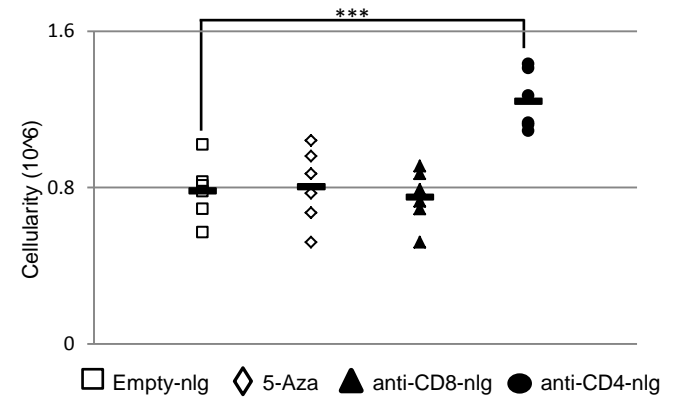

### Supplemental Figure 6. Specific targeting of nlG-5-Aza in CD4<sup>+</sup> T cells promotes expansion of Tregs in cervical lymph nodes.

MRL/*lpr* mice were treated i.v. with either anti-CD4 antibody coated-nlg-5-Aza (15 $\mu$ l nlG-5-Aza/mouse) or anti-CD8 antibody coated-nlg-5-Aza (15 $\mu$ l nlG-5-Aza/mouse) every ten days for 60 days starting at 12 weeks of age. Free-5-Aza (5 $\mu$ g/mouse) or empty-nlg were applied to two control group separately. (a) Flow cytometry quantization of the percentage of Foxp3<sup>+</sup>CD4 T cells (Thy1.2<sup>+</sup>CD4<sup>+</sup>) in cervical lymph nodes from mice subjected to the indicated treatment. Data represent the mean  $\pm$  SEM. (b) Dot plot graph shows quantitation of Foxp3<sup>+</sup>CD4 T cells (Thy1.2<sup>+</sup>CD4<sup>+</sup>) in cervical lymph nodes from mice subjected to the indicated treatment. \*\*\* $P$  < 0.005 vs. control, a 2-tailed Student's  $t$  test.  $n$  = 5-6 mice per group for 2 independent experiments.

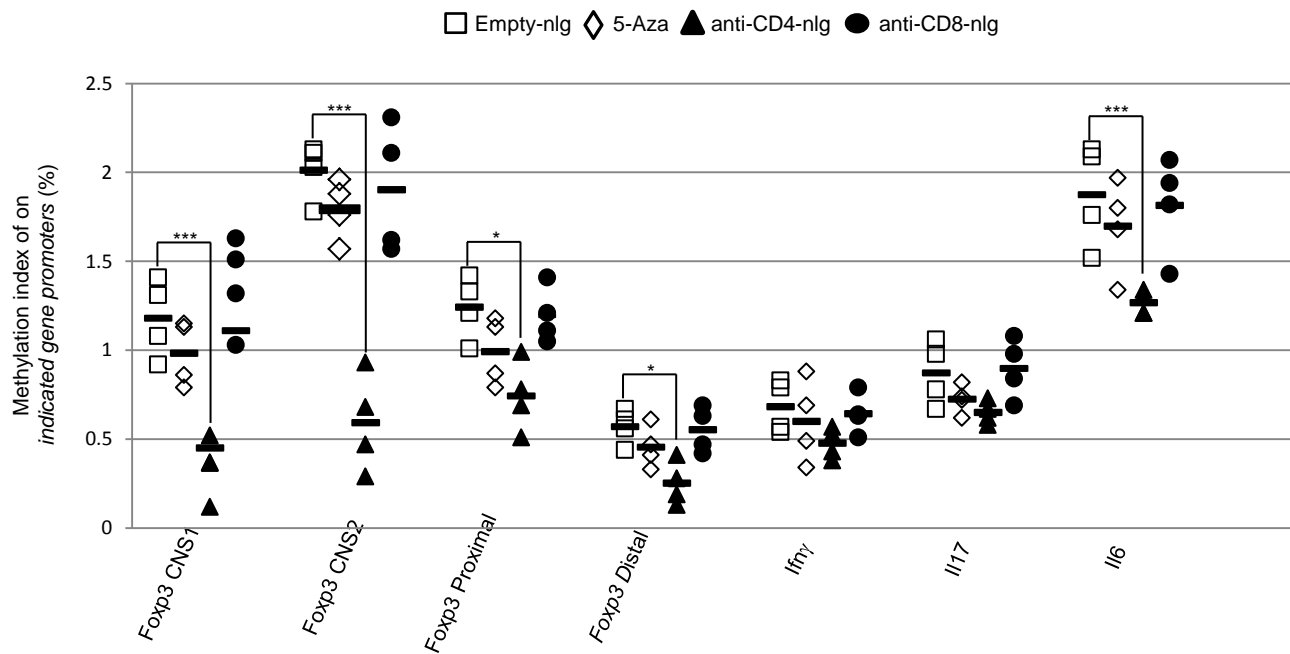

**Supplemental Figure 7. Nlg-5-Aza targeting to CD4 T cells but not free 5-Aza dramatically reduces Foxp3-associated DNA methylation in CD4 T cells.**

MRL/lpr mice were treated i.v. with either anti-CD4 antibody or anti-CD8 antibody coated-nlg-5-Aza (15 $\mu$ l nlg-5-Aza/mouse) for 10 hrs, free-5-Aza (5 $\mu$ g/mouse) or Empty-nlg were applied to two control groups separately.  $n = 4$  mice per group. Dot plot graph shows quantitation of DNA methylation on indicated gene promoters or enhancers in CD4 T cells sorted from mouse spleens 10 hrs after indicated treatment. \* $P < 0.05$ , \*\*\* $P < 0.005$  vs. control, a 2-tailed Student's  $t$  test.

a

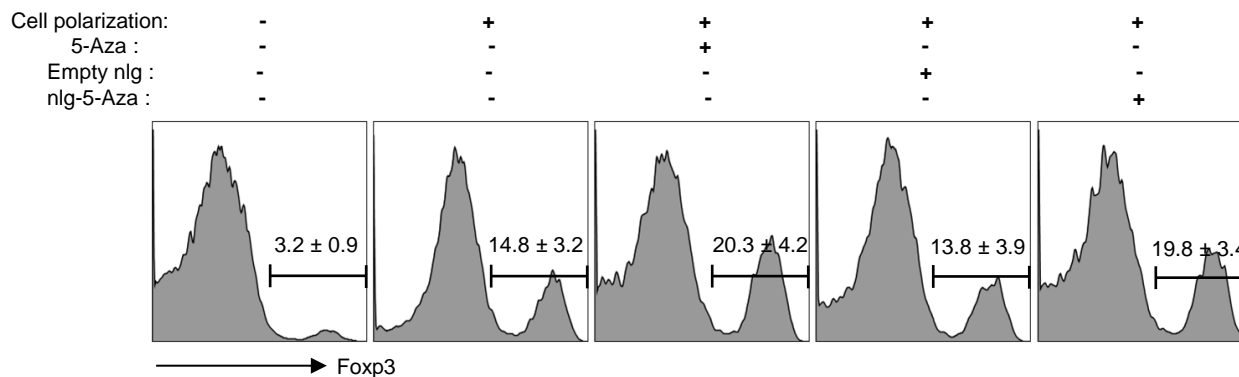

b

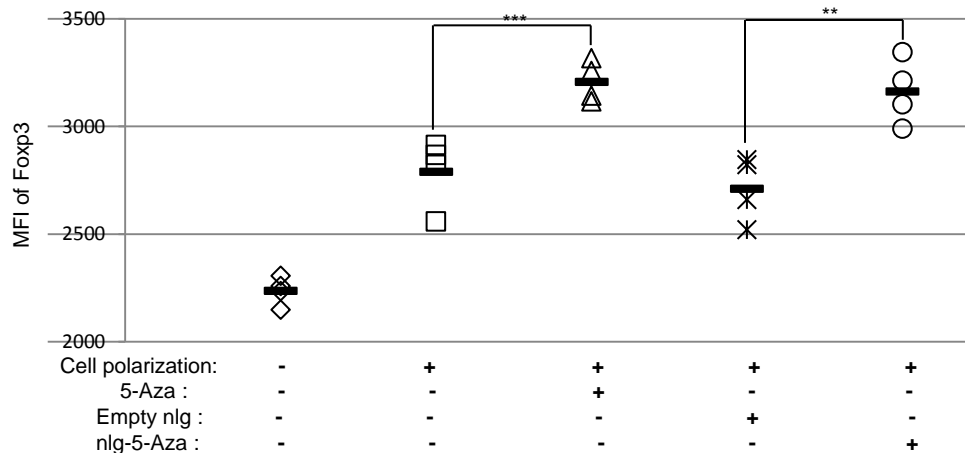

**Supplemental Figure 8. 5-Aza or nlG-5-Aza promotes expansion of Tregs under polarization conditions *in vitro*.**

Naive CD4 T-cells from healthy donors were polarized under Treg inducing conditions for 7 days, with Aza (1  $\mu$ M), empty nlG or 5-Aza-nlG (equivalent to 1  $\mu$ M) added 12 hrs before collection. (a) Flow cytometry analysis shows the induction of Foxp3 in CD4 T cells polarized *in vitro*. Data represent the mean  $\pm$  SEM. (b) Dot plot graph shows Mean fluorescence intensity (MFI) of Foxp3 expression in CD4 T cells polarized *in vitro*.  $n = 4$  per group. \*\* $P < 0.01$ , \*\*\* $P < 0.05$  vs. control, a 2-tailed Student's  $t$  test.



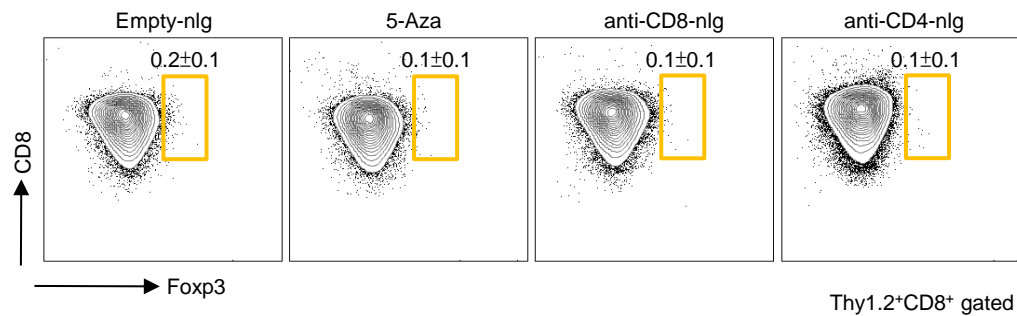

**Supplemental Figure 9. Specific targeting of nlG-5-Aza to CD8<sup>+</sup> T cells did not induce Foxp3 expression in CD8 T cells.**

MRL/*lpr* mice were treated i.v. with either anti-CD4 antibody coated-nlg-5-Aza (15 μl nlG-5-Aza/mouse) or anti-CD8 antibody coated-nlg-5-Aza (15 μl nlG-5-Aza/mouse) every ten days for 60 days starting at 12 weeks of age. Free-5-Aza (5 μg/mouse) or empty-nlg were applied to two control group separately. Flow cytometry quantization of the percentage of Foxp3<sup>+</sup> CD8 T cells (Thy1.2<sup>+</sup>CD8<sup>+</sup>) in spleens from mice subjected to the indicated treatment. Data represent the mean ± SEM (*n* = 5-6 mice per group for 2 independent experiments).

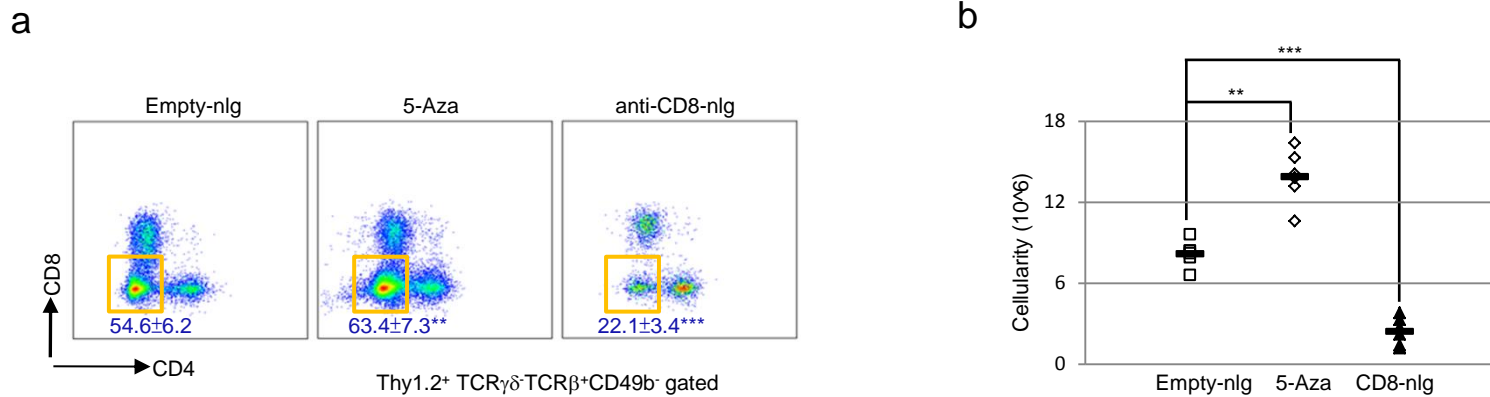

**Supplemental Figure 10. Specific targeting of nlG-5-Aza to CD8<sup>+</sup> T cells significantly reduces DN T cells in cervical lymph nodes.**

MRL/*lpr* mice were treated i.v. with anti-CD8 antibody coated-nlg-5-Aza (15 $\mu$ l nlG-5-Aza/mouse) every ten days for total 60 days total starting at 12 weeks of age. Free-5-Aza (5 $\mu$ g/mouse) or empty-nlg were applied to two control group separately. (a) Flow cytometry quantization of the percentage of Thy1.2<sup>+</sup>TCR $\beta$ <sup>+</sup>TCR $\gamma\delta$ <sup>+</sup>CD49b<sup>-</sup>CD8<sup>+</sup>T cells in cervical lymph nodes from mice subjected to the indicated treatment. Data represent the mean  $\pm$  SEM. (b) Dot plots show quantitation of the absolute cell numbers of Thy1.2<sup>+</sup>TCR $\beta$ <sup>+</sup>TCR $\gamma\delta$ <sup>+</sup>CD49b<sup>-</sup>CD8<sup>+</sup>T cells in cervical lymph nodes from mice subjected to the indicated treatment. \*\* $P$  < 0.01, \*\*\* $P$  < 0.005 vs. control, a 2-tailed Student's  $t$  test.  $n$  = 5-6 mice per group for 2 independent experiments.

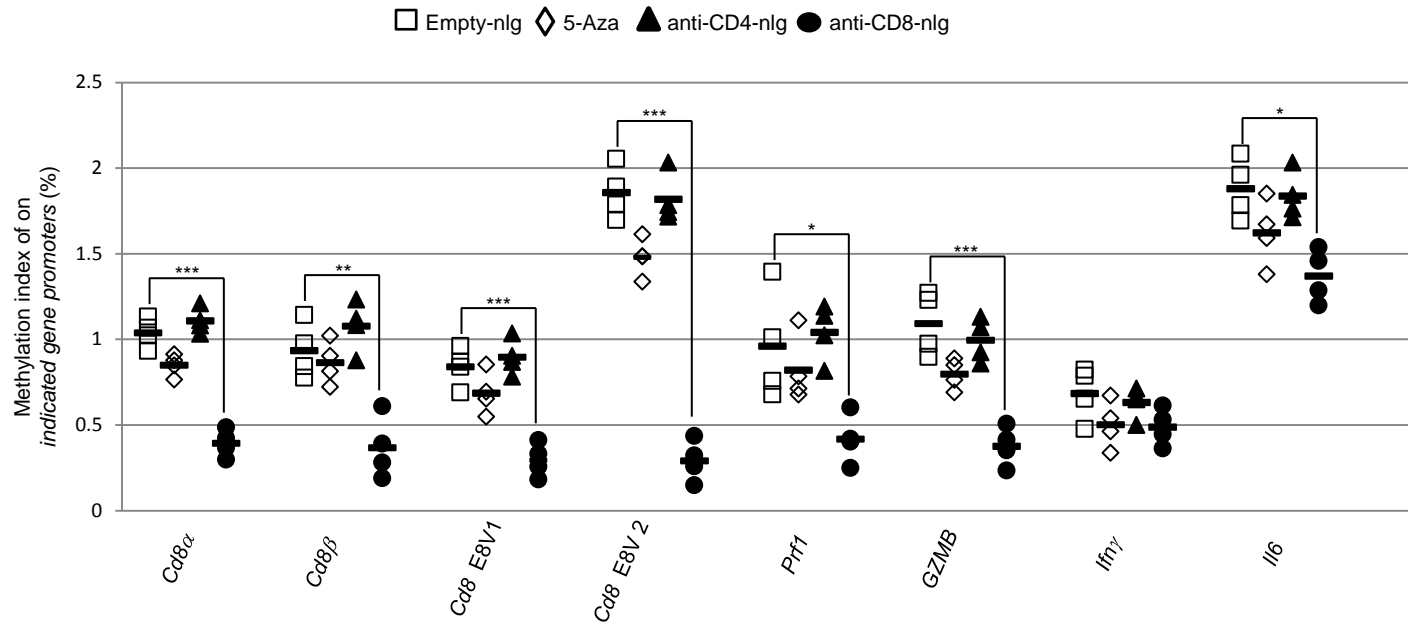

**Supplemental Figure 11. Nlg-5-Aza targeting to CD8 T cells but not free 5-Aza dramatically reduces cytolytic activity associated DNA methylation in CD8 T cells.**

MRL/*lpr* mice were treated i.v. with either anti-CD4 antibody or anti-CD8 antibody coated-nlg-5-Aza (15 $\mu$ l nlg-5-Aza/mouse) for 10 hrs, free-5-Aza (5 $\mu$ g/mouse) or Empty-nlg were applied to two control groups separately.  $n = 4$  mice per group. Dot plots show quantitation of DNA methylation on indicated gene promoters or enhancers in CD8 T cells sorted from mouse spleens 10 hrs after indicated treatment. \* $P < 0.05$ , \*\* $P < 0.01$ , \*\*\* $P < 0.005$  vs. control, a 2-tailed Student's  $t$  test.

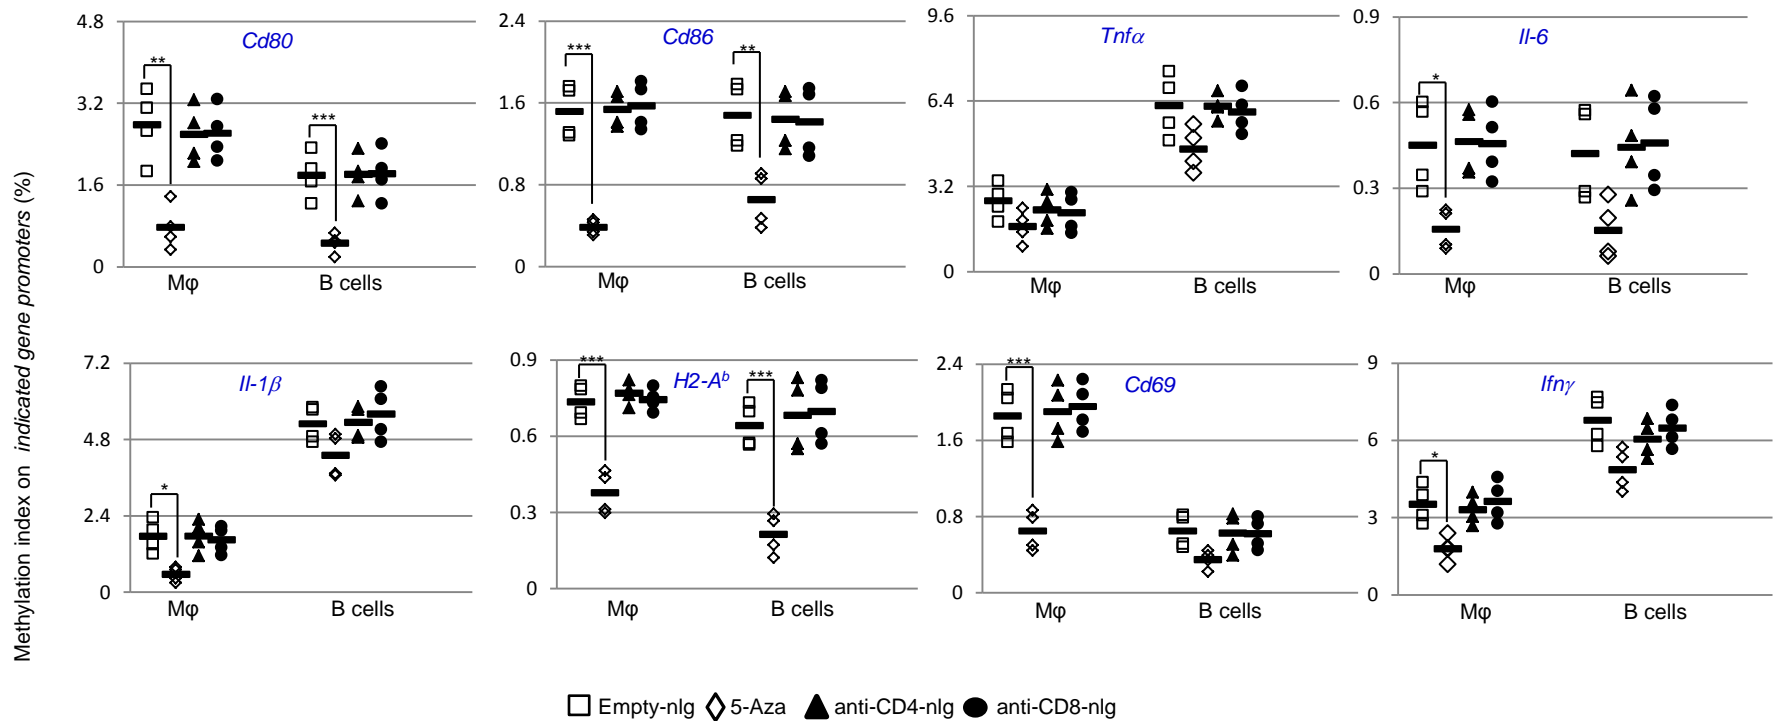

**Supplemental Figure 12. Free-5-Aza but not Nlg-5-Aza targeting to either CD4 or CD8 T cells dramatically reduces Inflammation-associated DNA methylation in macrophages and B cells.**

Age matched MRL/lpr mice were treated i.v. with either anti-CD4 antibody or anti-CD8 antibody coated-nlg-5-Aza (15μl nlg-5-Aza/mouse) for 10 hrs, free-5-Aza (5μg/mouse) or Empty-nlg were applied to two control groups separately.  $n = 4$  mice per group. Dot plot graph shows show quantitation of DNA methylation on indicated gene promoters or enhancers in macrophages (Mφ, CD11b<sup>+</sup>) or B cells (CD19<sup>+</sup>) sorted from MRL/lpr mouse spleens 10 hrs after indicated treatment. \* $P < 0.05$ , \*\* $P < 0.01$ , \*\*\* $P < 0.005$  vs. control, a 2-tailed Student's  $t$  test.

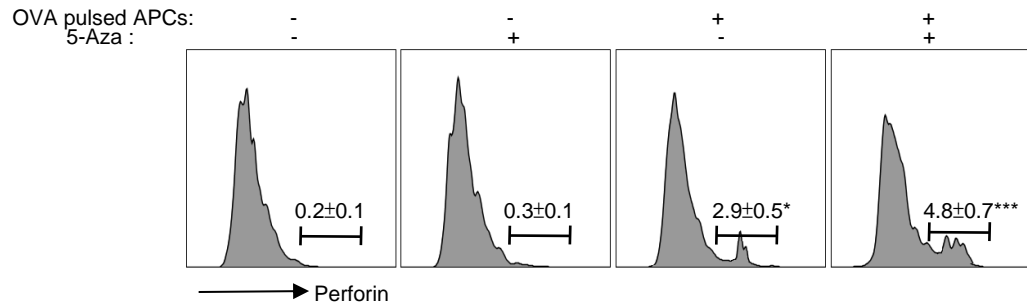

**Supplemental Figure 13. 5-Aza did not induce perforin expression in naïve CD8 T cells but could enhance perforin expression in activated CD8 T cells .**

Flow cytometry analysis of intracellular perforin expression in CD45.1<sup>+</sup>OT-I TCR Tg T cells from CD45.1 OT-I TCR Tg Rag1<sup>-/-</sup> B6 mice (CD45.1<sup>+</sup>TCRβ<sup>+</sup> gated) co-cultured with or without OVA<sub>257-264</sub> loaded antigen-presenting cells (APC) for 12 hrs in the absence or presence of 5-Aza (1μM). Data represent the mean ± SEM (*n* = 3-4 per group. \**P* < 0.05, \*\*\**P* < 0.005 vs. control, a 2-tailed Student's *t* test).

a

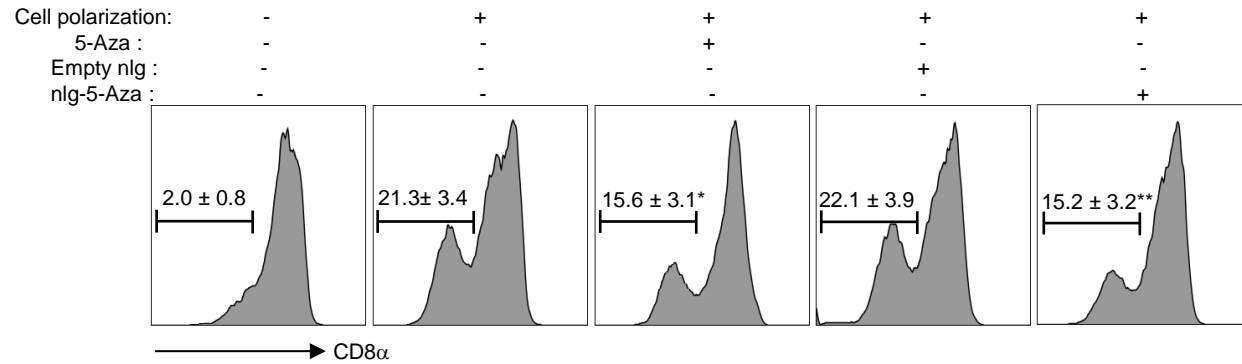

b

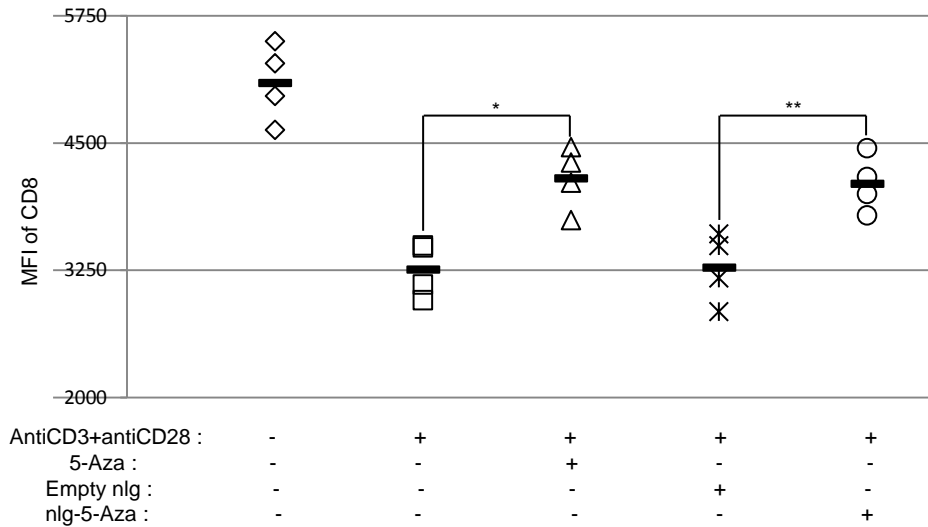

**Supplemental Figure 14. 5-Aza or nlg-5-Aza reduced activation induced CD8 downregulation *in vitro*.**

MACS enriched peripheral CD8 T cells from healthy donors were cultured with anti-CD3/anti-CD28 stimulus for 12 hrs with 5-Aza (1 $\mu$ M), empty-nlg or nlg-5-Azd (equivalent to 1 $\mu$ M).  $n = 4$  per group. (a) Flow cytometry analysis shows the activation induced CD8 downregulation on cell surface. Data represent the mean  $\pm$  SEM. (b) Dot plots graph shows MFI of CD8 expression after stimulation. \* $P < 0.05$ , \*\* $P < 0.01$  vs. indicated control, a 2-tailed Student's  $t$  test.
